# Supplementary material for: Cationic oligo- p-phenylene ethynylenes form complexes with surfactants for long-term light-activated biocidal applications
Source: Royal Society of Chemistry journal article supplement (doi:10.1039/c3pp50277e), 2013-10-14
Supplement: c3pp50277e.pdf [file c3pp50277e.pdf]

## Supporting Information:

### **Cationic oligo-p-Phenylene Ethynylenes form Complexes with Surfactants for Long-term Light-activated Biocidal Applications: Bacterial Killing and Stress Responses**

Eric Hill, Harry Pappas, David G. Whitten\*

Center for Biomedical Engineering, Department of Chemical and Nuclear Engineering,  
University of New Mexico, Albuquerque, New Mexico 87131-1341, United States

\*corresponding author

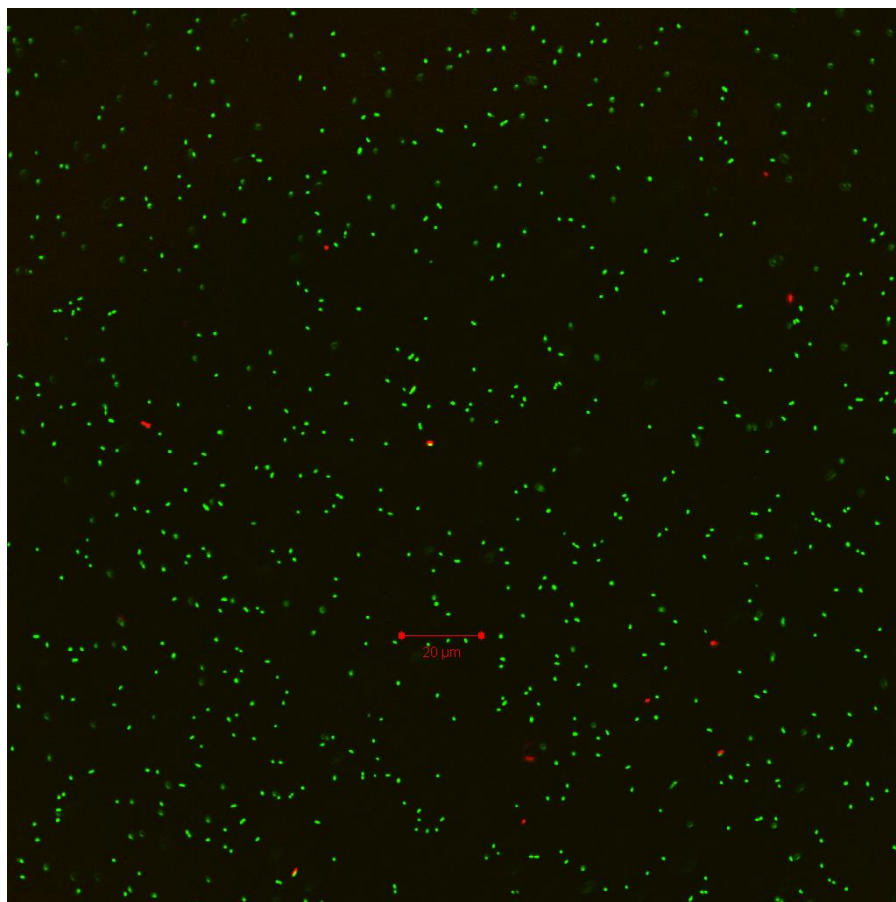

Figure S1. Confocal Fluorescence Microscopy images of E. coli Negative Control

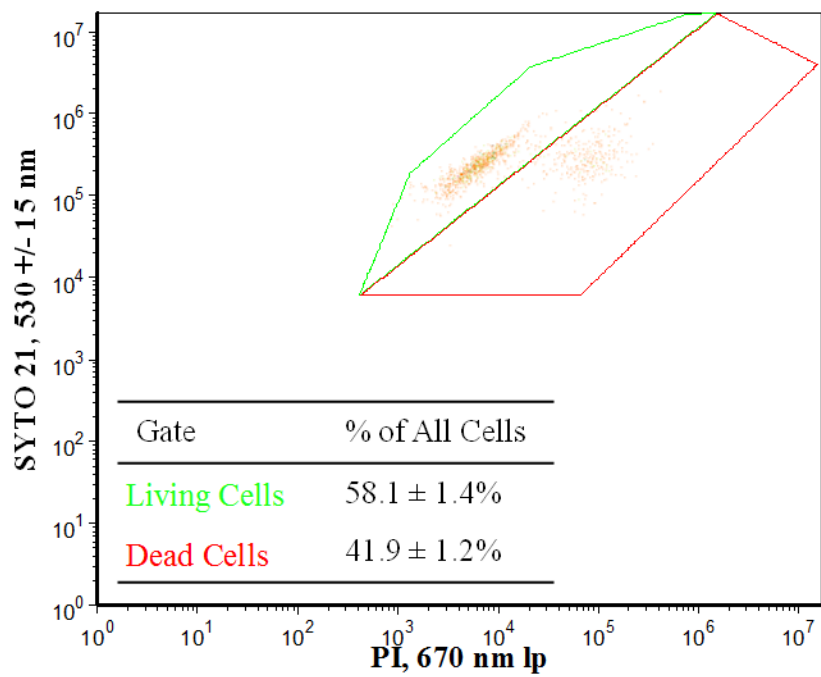

Figure S2. Flow Cytometry Analysis of *E. Coli* with 40 uM SDS Control

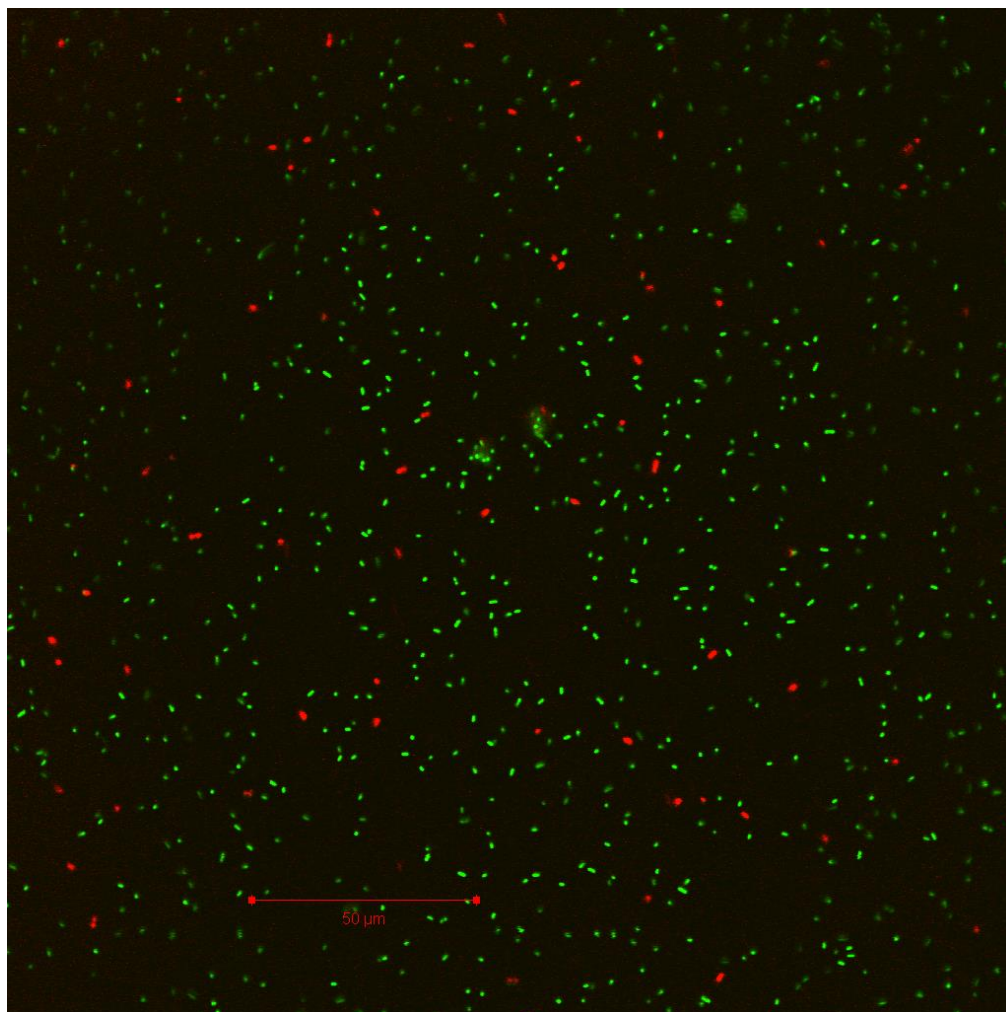

Figure S3. Confocal Fluorescence Microscopy images of E. Coli with 40 uM SDS Control

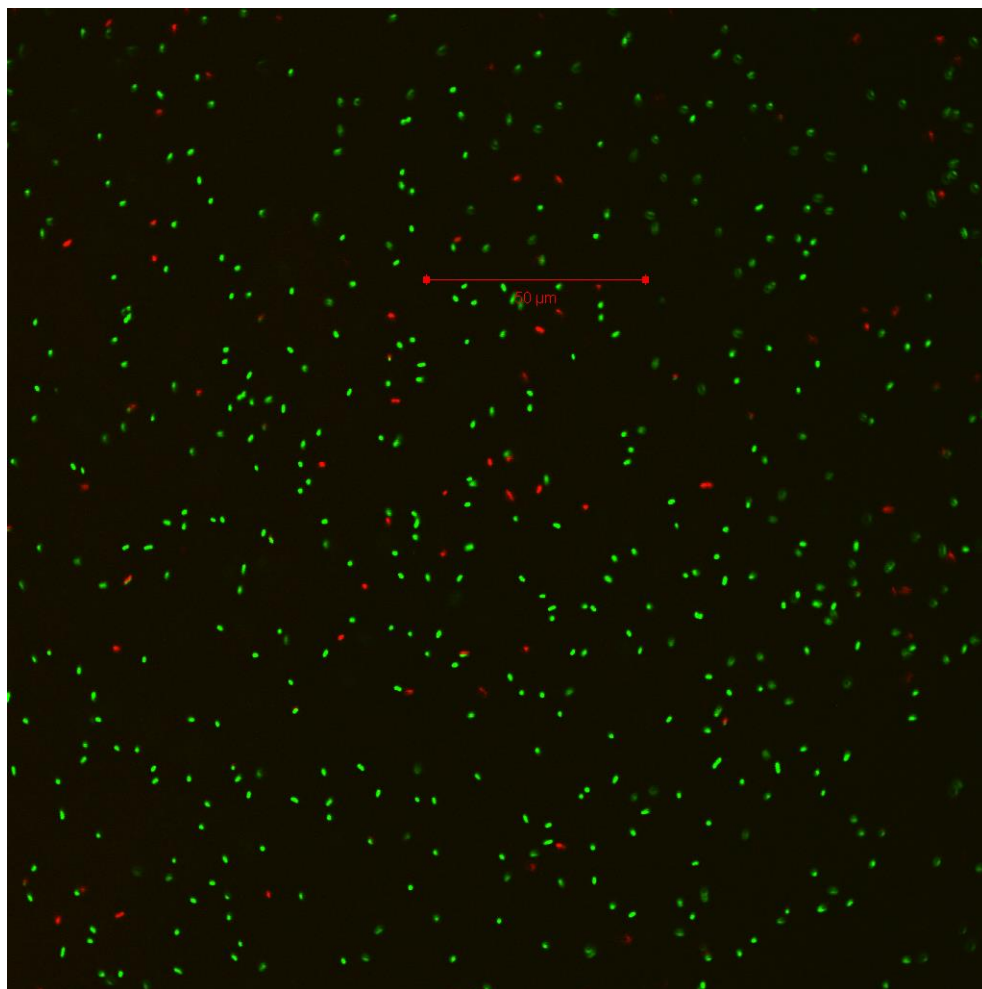

Figure S4. Confocal Fluorescence Microscopy images of *E. Coli* exposed to 2 hour pre-irradiated **1**

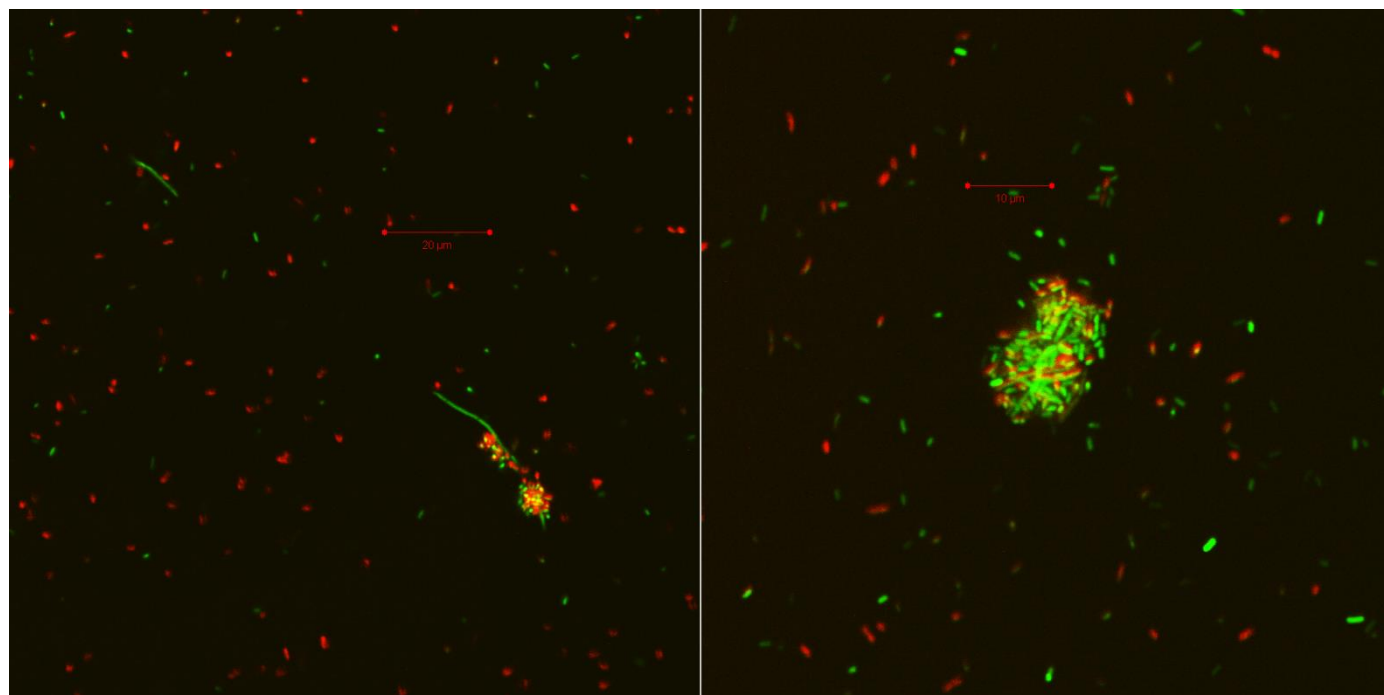

Figure S5. Confocal Fluorescence Microscopy images of *E. Coli* exposed to 2 hour pre-irradiated 1-SDS

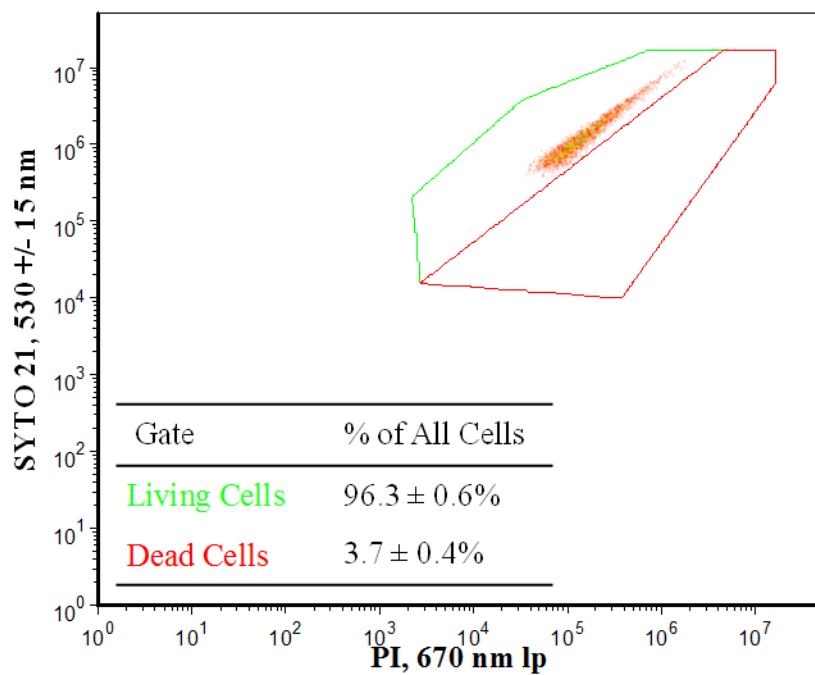

Figure S6. Flow Cytometry Analysis of *S. Aureus* with 0.33 mM SDS Control
